# Supplementary material for: Emergency Hospital Visits in Association with Volcanic Ash, Dust Storms and Other Sources of Ambient Particles: A Time-Series Study in Reykjavík, Iceland
Source: PubMed Central journal article supplement (PMC4410232; doi:10.3390/ijerph120404047), 2015-04-13
Supplement: ijerph-12-04047-s001.pdf [file ijerph-12-04047-s001.pdf]

## Emergency Hospital Visits in Association with Volcanic Ash, Dust Storms and Other Sources of Ambient Particles: A Time-Series Study in Reykjavík, Iceland

**Table S1.** Associations between daily emergency hospital visits for cardiorespiratory causes for one day of exposure to different sources of high PM<sub>10</sub> values at different lag intervals 0–7. All models are adjusted for time trend, annual variation, climate and influenza season, but not other pollutants.

| PM <sub>10</sub> Source | Percent Change in Emergency Hospital Visits * |          | Model                 |
|-------------------------|-----------------------------------------------|----------|-----------------------|
|                         | %                                             | <i>p</i> | <i>R</i> <sup>2</sup> |
| <i>All sources</i>      |                                               |          |                       |
| -Lag0                   | 1.9                                           | 0.54     | 0.22                  |
| -Lag02                  | 0.9                                           | 0.61     | 0.22                  |
| -Lag05                  | −0.3                                          | 0.78     | 0.21                  |
| -Lag07                  | −0.6                                          | 0.57     | 0.21                  |
| <i>Volcanic ash</i>     |                                               |          |                       |
| -Lag0                   | 4.9                                           | 0.58     | 0.22                  |
| -Lag02                  | 8.4                                           | 0.04     | 0.22                  |
| -Lag05                  | 7.2                                           | 0.01     | 0.22                  |
| -Lag07                  | 5.1                                           | 0.02     | 0.22                  |
| <i>Natural dust</i>     |                                               |          |                       |
| -Lag0                   | 13.6                                          | 0.11     | 0.23                  |
| -Lag02                  | 8.6                                           | 0.04     | 0.22                  |
| -Lag05                  | 6.1                                           | 0.05     | 0.21                  |
| -Lag07                  | 5.7                                           | 0.02     | 0.21                  |
| <i>Other sources</i>    |                                               |          |                       |
| -Lag0                   | −0.2                                          | 0.95     | 0.22                  |
| -Lag02                  | −2.1                                          | 0.28     | 0.22                  |
| -Lag05                  | −3.3                                          | 0.02     | 0.22                  |
| -Lag07                  | −3.4                                          | 0.01     | 0.21                  |
